# Supplementary material for: Exploring the Interplay between Mitochondrial DNA and Lifestyle Factors in the Pathogenesis of Psychiatric Disorders
Source: Hindawi journal article supplement (doi:10.1155/2024/4914777), 2024-03-20
Supplement: f1 [file 4914777.f1.pdf]

## Legends for Supplementary Tables

Table S1. Associations of Mitochondrial SNVs With Anxiety

Table S2. Associations of Mitochondrial SNVs With Depression

Table S3. Associations of Mitochondrial SNVs With Self-harm

Table S4. Associations of Mitochondrial Gene-by-environment interactions With Anxiety

Table S5. Associations of Mitochondrial Gene-by-environment interactions With Depression

Table S6. Associations of Mitochondrial Gene-by-environment interactions With Self-harm

**Table S1. Associations of Mitochondrial SNVs With Anxiety**

| Gender | Chromosome (CHR) | SNP ID        | Base Pair Position (BP) | Allele 1 (A1) | Anxiety Type | NMISS | Effect Size (BETA) | Std. Error (SE) | 95% CI Lower (L95) | 95% CI Upper (U95) | STAT   | P-value  | Gene     |
|--------|------------------|---------------|-------------------------|---------------|--------------|-------|--------------------|-----------------|--------------------|--------------------|--------|----------|----------|
| Total  | 26               | Affx-92047849 | 4529                    | T             | Anx_self     | 66868 | -0.02211           | 0.008633        | -0.03903           | -0.005193          | -2.562 | 0.01042  | MT-ND2   |
| Total  | 26               | Affx-79381726 | 16391                   | A             | Anx_self     | 66653 | -0.0203            | 0.008503        | -0.03697           | -0.003638          | -2.388 | 0.01695  | MT-DLOOP |
| Total  | 26               | Affx-34462179 | 6734                    | A             | Anx_self     | 66680 | -0.03569           | 0.01498         | -0.06505           | -0.006338          | -2.383 | 0.01717  | MT-CO1   |
| Total  | 26               | Affx-86886472 | 12501                   | A             | Anx_self     | 66787 | -0.01929           | 0.00819         | -0.03534           | -0.003239          | -2.356 | 0.0185   | MT-ND5   |
| Total  | 26               | Affx-34462338 | 9716                    | C             | Anx_self     | 66861 | 0.02787            | 0.01189         | 0.004568           | 0.05117            | 2.344  | 0.01907  | MT-CO3   |
| Total  | 26               | Affx-34461976 | 3010                    | A             | Anx_self     | 66734 | -0.007996          | 0.003412        | -0.01468           | -0.001309          | -2.344 | 0.01911  | MT-RNR2  |
| Total  | 26               | Affx-79381687 | 10238                   | C             | Anx_self     | 66774 | -0.0188            | 0.008294        | -0.03505           | -0.00254           | -2.266 | 0.02344  | MT-ND3   |
| Total  | 26               | Affx-79381658 | 1719                    | A             | Anx_self     | 66769 | -0.01236           | 0.005474        | -0.02309           | -0.00163           | -2.258 | 0.02397  | MT-RNR2  |
| Total  | 26               | Affx-79381709 | 15043                   | A             | Anx_self     | 66741 | -0.01609           | 0.007564        | -0.03091           | -0.001264          | -2.127 | 0.03342  | MT-CYB   |
| Total  | 26               | Affx-79381704 | 13780                   | G             | Anx_self     | 66821 | -0.01768           | 0.008445        | -0.03424           | -0.001133          | -2.094 | 0.03625  | MT-ND5   |
| Total  | 26               | Affx-79381694 | 10915                   | C             | Anx_self     | 66817 | -0.02791           | 0.01372         | -0.05481           | -0.001014          | -2.034 | 0.04197  | MT-ND4   |
| Total  | 26               | Affx-79381715 | 15924                   | G             | Anx_self     | 66645 | -0.01281           | 0.006342        | -0.02524           | -0.0003789         | -2.02  | 0.04342  | MT-TT    |
| Total  | 26               | Affx-34462060 | 4561                    | C             | Anx_score    | 74657 | 0.2621             | 0.1054          | 0.0554             | 0.4687             | 2.485  | 0.01294  | MT-ND2   |
| Total  | 26               | Affx-34462338 | 9716                    | C             | Anx_score    | 74690 | 0.2223             | 0.09328         | 0.03943            | 0.4051             | 2.383  | 0.01719  | MT-CO3   |
| Total  | 26               | Affx-34462182 | 6776                    | C             | Anx_score    | 74638 | -0.1204            | 0.05242         | -0.2232            | -0.01768           | -2.297 | 0.02161  | MT-CO1   |
| Total  | 26               | Affx-34461959 | 2706                    | A             | Anx_score    | 74633 | -0.05272           | 0.02373         | -0.09922           | -0.006216          | -2.222 | 0.02629  | MT-RNR2  |
| Total  | 26               | Affx-79381724 | 16270                   | T             | Anx_score    | 74473 | 0.0871             | 0.04151         | 0.005748           | 0.1685             | 2.098  | 0.03587  | MT-DLOOP |
| Total  | 26               | Affx-34462190 | 7028                    | C             | Anx_score    | 74635 | -0.04932           | 0.02372         | -0.09581           | -0.002838          | -2.08  | 0.03756  | MT-CO1   |
| Total  | 26               | Affx-34461680 | 12372                   | A             | Anx_score    | 74610 | 0.05873            | 0.02828         | 0.003298           | 0.1142             | 2.077  | 0.03785  | MT-ND5   |
| Total  | 26               | Affx-79381696 | 11467                   | G             | Anx_score    | 74536 | 0.05765            | 0.02835         | 0.002082           | 0.1132             | 2.033  | 0.04201  | MT-ND4   |
| Total  | 26               | Affx-79381683 | 9667                    | G             | Anx_score    | 74636 | 0.2059             | 0.1044          | 0.001159           | 0.4106             | 1.971  | 0.04872  | MT-CO3   |
| Male   | 26               | Affx-79443437 | 5999                    | C             | Anx_self     | 30866 | -0.0319            | 0.0139          | -0.05914           | -0.00465           | -2.294 | 0.02177  | MT-CO1   |
| Male   | 26               | Affx-92047865 | 14620                   | T             | Anx_self     | 30857 | -0.03108           | 0.01378         | -0.0581            | -0.004067          | -2.255 | 0.02414  | MT-ND6   |
| Male   | 26               | Affx-79443438 | 6047                    | G             | Anx_self     | 30877 | -0.03093           | 0.01388         | -0.05813           | -0.003722          | -2.228 | 0.02588  | MT-CO1   |
| Male   | 26               | Affx-89025690 | 15693                   | C             | Anx_self     | 30881 | -0.0309            | 0.01389         | -0.05813           | -0.003668          | -2.224 | 0.02615  | MT-CYB   |
| Male   | 26               | Affx-92047873 | 11332                   | T             | Anx_self     | 30871 | -0.02968           | 0.01387         | -0.05686           | -0.002499          | -2.14  | 0.03235  | MT-ND4   |
| Male   | 26               | Affx-34461957 | 263                     | A             | Anx_self     | 30810 | 0.04153            | 0.02001         | 0.002312           | 0.08075            | 2.076  | 0.03795  | MT-DLOOP |
| Male   | 26               | Affx-92047859 | 8448                    | C             | Anx_self     | 30886 | 0.03529            | 0.01761         | 0.0007786          | 0.0698             | 2.004  | 0.04506  | MT-ATP8  |
| Female | 26               | Affx-89025745 | 15218                   | G             | Anx_self     | 35935 | 0.02819            | 0.01102         | 0.006583           | 0.04979            | 2.557  | 0.01056  | MT-CYB   |
| Female | 26               | Affx-34462338 | 9716                    | C             | Anx_self     | 35976 | 0.04247            | 0.01734         | 0.008489           | 0.07645            | 2.45   | 0.01431  | MT-CO3   |
| Female | 26               | Affx-79381658 | 1719                    | A             | Anx_self     | 35931 | -0.01876           | 0.00801         | -0.03446           | -0.00306           | -2.342 | 0.01919  | MT-RNR2  |
| Female | 26               | Affx-34461976 | 3010                    | A             | Anx_self     | 35921 | -0.01151           | 0.005013        | -0.02134           | -0.00169           | -2.297 | 0.02162  | MT-RNR2  |
| Female | 26               | Affx-79381687 | 10238                   | C             | Anx_self     | 35944 | -0.02763           | 0.01224         | -0.05162           | -0.003647          | -2.258 | 0.02395  | MT-ND3   |
| Female | 26               | Affx-34461837 | 15758                   | G             | Anx_self     | 35963 | -0.03661           | 0.01632         | -0.06859           | -0.004629          | -2.244 | 0.02486  | MT-CYB   |
| Female | 26               | Affx-79381694 | 10915                   | C             | Anx_self     | 35960 | -0.04572           | 0.02047         | -0.08584           | -0.005598          | -2.233 | 0.02553  | MT-ND4   |
| Female | 26               | Affx-34461715 | 13105                   | G             | Anx_self     | 35899 | 0.04437            | 0.01996         | 0.005247           | 0.0835             | 2.223  | 0.02624  | MT-ND5   |
| Female | 26               | Affx-79381726 | 16391                   | A             | Anx_self     | 35863 | -0.02762           | 0.01256         | -0.05223           | -0.003001          | -2.199 | 0.02789  | MT-DLOOP |
| Female | 26               | Affx-92047849 | 4529                    | T             | Anx_self     | 35981 | -0.02751           | 0.01276         | -0.05252           | -0.002497          | -2.156 | 0.03112  | MT-ND2   |
| Female | 26               | Affx-86886472 | 12501                   | A             | Anx_self     | 35940 | -0.02594           | 0.01206         | -0.04958           | -0.002295          | -2.15  | 0.03155  | MT-ND5   |
| Female | 26               | Affx-34462179 | 6734                    | A             | Anx_self     | 35889 | -0.04421           | 0.02232         | -0.08796           | -0.0004667         | -1.981 | 0.04761  | MT-CO1   |
| Female | 26               | Affx-34462338 | 9716                    | C             | Anx_score    | 40882 | 0.3459             | 0.1325          | 0.08622            | 0.6056             | 2.611  | 0.009039 | MT-CO3   |
| Female | 26               | Affx-34461959 | 2706                    | A             | Anx_score    | 40858 | -0.08637           | 0.03419         | -0.1534            | -0.01936           | -2.526 | 0.01153  | MT-RNR2  |
| Female | 26               | Affx-34462060 | 4561                    | C             | Anx_score    | 40861 | 0.3648             | 0.1488          | 0.07318            | 0.6564             | 2.452  | 0.01422  | MT-ND2   |
| Female | 26               | Affx-34462190 | 7028                    | C             | Anx_score    | 40859 | -0.07927           | 0.03418         | -0.1463            | -0.01228           | -2.319 | 0.0204   | MT-CO1   |
| Female | 26               | Affx-79381724 | 16270                   | T             | Anx_score    | 40777 | 0.133              | 0.05977         | 0.01583            | 0.2501             | 2.225  | 0.0261   | MT-DLOOP |
| Female | 26               | Affx-34462062 | 4580                    | A             | Anx_score    | 40768 | 0.2062             | 0.09356         | 0.02281            | 0.3895             | 2.204  | 0.02754  | MT-ND2   |
| Female | 26               | Affx-79381668 | 4336                    | C             | Anx_score    | 40869 | -0.2324            | 0.109           | -0.446             | -0.0188            | -2.132 | 0.03297  | MT-TQ    |

Note: Anx\_self, self-reported anxiety; Anx\_score, anxiety score

**Table S2. Associations of Mitochondrial SNVs With Depression**

| Gender | Chromosome (CHR) | SNP ID        | Base Pair Position (BP) | Allele 1 (A1) | Depression Type | NMISS  | Effect Size (BETA) | Std. Error (SE) | 95% CI Lower (L95) | 95% CI Upper (U95) | STAT   | P-value   | Gene     |
|--------|------------------|---------------|-------------------------|---------------|-----------------|--------|--------------------|-----------------|--------------------|--------------------|--------|-----------|----------|
| Total  | 26               | Affx-34461653 | 11914                   | A             | Dep_score       | 74223  | 0.2254             | 0.09336         | 0.04245            | 0.4084             | 2.415  | 0.01575   | MT-ND4   |
| Total  | 26               | Affx-34462338 | 9716                    | C             | Dep_score       | 74412  | 0.2178             | 0.09874         | 0.02424            | 0.4113             | 2.205  | 0.02743   | MT-CO3   |
| Total  | 26               | Affx-34462196 | 709                     | A             | Dep_self        | 107510 | 0.01278            | 0.004123        | 0.0047             | 0.02086            | 3.1    | 0.001937  | MT-RNR1  |
| Total  | 26               | Affx-79381691 | 10463                   | C             | Dep_self        | 107739 | 0.01375            | 0.00474         | 0.004459           | 0.02304            | 2.901  | 0.003723  | MT-TR    |
| Total  | 26               | Affx-89025732 | 8697                    | A             | Dep_self        | 107907 | 0.01216            | 0.004865        | 0.00262            | 0.02169            | 2.498  | 0.01248   | MT-ATP6  |
| Total  | 26               | Affx-79381671 | 4917                    | G             | Dep_self        | 107905 | 0.01196            | 0.004874        | 0.002406           | 0.02151            | 2.454  | 0.01415   | MT-ND2   |
| Total  | 26               | Affx-79381690 | 10398                   | G             | Dep_self        | 107524 | -0.008843          | 0.003609        | -0.01592           | -0.001769          | -2.45  | 0.01428   | MT-ND3   |
| Total  | 26               | Affx-34462060 | 4561                    | C             | Dep_self        | 107972 | 0.0317             | 0.01294         | 0.006337           | 0.05707            | 2.45   | 0.0143    | MT-ND2   |
| Total  | 26               | Affx-34461806 | 14905                   | A             | Dep_self        | 107914 | 0.01149            | 0.004846        | 0.00199            | 0.02099            | 2.371  | 0.01776   | MT-CYB   |
| Total  | 26               | Affx-79381664 | 3915                    | A             | Dep_self        | 107971 | 0.0213             | 0.009004        | 0.003657           | 0.03895            | 2.366  | 0.01798   | MT-ND1   |
| Total  | 26               | Affx-34462062 | 4580                    | A             | Dep_self        | 107694 | 0.018              | 0.008104        | 0.002119           | 0.03389            | 2.221  | 0.02632   | MT-ND2   |
| Total  | 26               | Affx-79381716 | 15928                   | A             | Dep_self        | 107440 | 0.0102             | 0.004862        | 0.0006753          | 0.01973            | 2.099  | 0.03583   | MT-TT    |
| Total  | 26               | Affx-52321592 | 228                     | A             | Dep_self        | 107736 | -0.01228           | 0.005977        | -0.024             | -0.0005671         | -2.055 | 0.0399    | MT-DLOOP |
| Total  | 26               | Affx-34461648 | 11812                   | G             | Dep_self        | 107966 | 0.01067            | 0.005357        | 0.000171           | 0.02117            | 1.992  | 0.04639   | MT-ND4   |
| Total  | 26               | Affx-34461996 | 3394                    | C             | Dep_self        | 107888 | -0.02445           | 0.01235         | -0.04866           | -0.0002346         | -1.979 | 0.04782   | MT-ND1   |
| Total  | 26               | Affx-89025778 | 5147                    | A             | Dep_self        | 107959 | 0.01226            | 0.006211        | 8.28E-05           | 0.02443            | 1.973  | 0.04846   | MT-ND2   |
| Male   | 26               | Affx-34461653 | 11914                   | A             | Dep_score       | 33604  | 0.4495             | 0.1307          | 0.1932             | 0.7057             | 3.438  | 0.0005866 | MT-ND4   |
| Male   | 26               | Affx-79381672 | 5004                    | C             | Dep_score       | 33675  | 0.3084             | 0.1237          | 0.06598            | 0.5508             | 2.493  | 0.01266   | MT-ND2   |
| Male   | 26               | Affx-79504644 | 73                      | A             | Dep_score       | 33642  | -0.08006           | 0.03587         | -0.1504            | -0.00975           | -2.232 | 0.02564   | MT-DLOOP |
| Male   | 26               | Affx-79381708 | 14582                   | G             | Dep_score       | 33316  | 0.2743             | 0.1304          | 0.01877            | 0.5298             | 2.104  | 0.03539   | MT-ND6   |
| Male   | 26               | Affx-79381714 | 15833                   | T             | Dep_score       | 33647  | 0.2641             | 0.1276          | 0.01394            | 0.5143             | 2.069  | 0.03854   | MT-CYB   |
| Male   | 26               | Affx-34461570 | 10044                   | G             | Dep_score       | 33682  | 0.359              | 0.1737          | 0.01858            | 0.6994             | 2.067  | 0.03875   | MT-TG    |
| Male   | 26               | Affx-79381667 | 3992                    | T             | Dep_score       | 33666  | 0.2362             | 0.1162          | 0.008458           | 0.464              | 2.033  | 0.04209   | MT-ND1   |
| Male   | 26               | Affx-34462030 | 4024                    | G             | Dep_score       | 33671  | 0.2537             | 0.1273          | 0.004098           | 0.5033             | 1.992  | 0.04636   | MT-ND1   |
| Male   | 26               | Affx-79381664 | 3915                    | A             | Dep_self        | 46825  | 0.03283            | 0.01326         | 0.006842           | 0.05881            | 2.476  | 0.01329   | MT-ND1   |
| Female | 26               | Affx-34462338 | 9716                    | C             | Dep_score       | 40723  | 0.2876             | 0.1353          | 0.02244            | 0.5527             | 2.126  | 0.03352   | MT-CO3   |
| Female | 26               | Affx-34462062 | 4580                    | A             | Dep_score       | 40610  | 0.1974             | 0.09566         | 0.009891           | 0.3849             | 2.063  | 0.03909   | MT-ND2   |
| Female | 26               | Affx-79381700 | 12705                   | T             | Dep_score       | 40693  | -0.1346            | 0.06693         | -0.2657            | -0.003381          | -2.01  | 0.04439   | MT-ND5   |
| Female | 26               | Affx-79381691 | 10463                   | C             | Dep_self        | 61038  | 0.01684            | 0.006389        | 0.004318           | 0.02936            | 2.636  | 0.008395  | MT-TR    |
| Female | 26               | Affx-34462196 | 709                     | A             | Dep_self        | 60899  | 0.01371            | 0.005554        | 0.002822           | 0.02459            | 2.468  | 0.01359   | MT-RNR1  |
| Female | 26               | Affx-34461803 | 14798                   | C             | Dep_self        | 61153  | -0.01293           | 0.005333        | -0.02338           | -0.002477          | -2.424 | 0.01533   | MT-CYB   |
| Female | 26               | Affx-34461806 | 14905                   | A             | Dep_self        | 61127  | 0.01519            | 0.006518        | 0.002419           | 0.02797            | 2.331  | 0.01976   | MT-CYB   |
| Female | 26               | Affx-89025732 | 8697                    | A             | Dep_self        | 61103  | 0.0152             | 0.00655         | 0.002365           | 0.02804            | 2.321  | 0.02029   | MT-ATP6  |
| Female | 26               | Affx-52321592 | 228                     | A             | Dep_self        | 61033  | -0.01812           | 0.008021        | -0.03384           | -0.002397          | -2.259 | 0.0239    | MT-DLOOP |
| Female | 26               | Affx-79381671 | 4917                    | G             | Dep_self        | 61111  | 0.01433            | 0.006556        | 0.001482           | 0.02718            | 2.186  | 0.02882   | MT-ND2   |
| Female | 26               | Affx-79381690 | 10398                   | G             | Dep_self        | 60901  | -0.01052           | 0.004863        | -0.02005           | -0.0009856         | -2.163 | 0.03057   | MT-ND3   |
| Female | 26               | Affx-79381716 | 15928                   | A             | Dep_self        | 60849  | 0.01411            | 0.006541        | 0.001286           | 0.02693            | 2.157  | 0.03104   | MT-TT    |
| Female | 26               | Affx-89025778 | 5147                    | A             | Dep_self        | 61154  | 0.01785            | 0.008331        | 0.00152            | 0.03418            | 2.142  | 0.03216   | MT-ND2   |
| Female | 26               | Affx-34462060 | 4561                    | C             | Dep_self        | 61147  | 0.03613            | 0.01737         | 0.002074           | 0.07018            | 2.079  | 0.03759   | MT-ND2   |

Note: Dep\_self, self-reported depression; Dep\_score, depression score

**Table S3. Associations of Mitochondrial SNVs With Self-harm**

| Gender | Chromosome (CHR) | SNP ID        | Base Pair Position (BP) | Allele 1 (A1) | NMISS  | Effect Size (BETA) | Std. Error (SE) | 95% CI Lower (L95) | 95% CI Upper (U95) | STAT   | P-value  | Gene    |
|--------|------------------|---------------|-------------------------|---------------|--------|--------------------|-----------------|--------------------|--------------------|--------|----------|---------|
| Total  | 26               | Affx-79443499 | 13759                   | A             | 108280 | 0.02206            | 0.008159        | 0.006071           | 0.03805            | 2.704  | 0.006852 | MT-ND5  |
| Total  | 26               | Affx-79381683 | 9667                    | G             | 108610 | -0.02361           | 0.009465        | -0.04216           | -0.005062          | -2.495 | 0.01261  | MT-CO3  |
| Total  | 26               | Affx-92047859 | 8448                    | C             | 108702 | 0.02162            | 0.009426        | 0.003141           | 0.04009            | 2.293  | 0.02184  | MT-ATP8 |
| Total  | 26               | Affx-34461763 | 13966                   | G             | 108639 | 0.0171             | 0.007773        | 0.001865           | 0.03233            | 2.2    | 0.02782  | MT-ND5  |
| Male   | 26               | Affx-34461653 | 11914                   | A             | 47352  | 0.02843            | 0.0106          | 0.007657           | 0.04921            | 2.682  | 0.007313 | MT-ND4  |
| Male   | 26               | Affx-34461715 | 13105                   | G             | 47364  | 0.03277            | 0.01348         | 0.00636            | 0.05919            | 2.432  | 0.01502  | MT-ND5  |
| Male   | 26               | Affx-34462062 | 4580                    | A             | 47340  | -0.01695           | 0.008085        | -0.0328            | -0.001107          | -2.097 | 0.03601  | MT-ND2  |
| Male   | 26               | Affx-92047866 | 14869                   | A             | 45283  | 0.02844            | 0.0144          | 0.0002221          | 0.05665            | 1.975  | 0.04823  | MT-CYB  |
| Female | 26               | Affx-79443499 | 13759                   | A             | 61005  | 0.02455            | 0.0115          | 0.002009           | 0.0471             | 2.135  | 0.0328   | MT-ND5  |

**Table S4. Associations of Mitochondrial Gene-by-environment Interactions With Anxiety**

| Gender | Chromosome (CHR) | SNP ID        | Base Pair Position (BP) | Allele 1 (A1) | Anxiety Type | Environment     | NMSS  | Effect Size (BETA) | Std. Error (SE) | 95% CI Lower (L95) | 95% CI Upper (U95) | STAT   | P-value   | Gene     |
|--------|------------------|---------------|-------------------------|---------------|--------------|-----------------|-------|--------------------|-----------------|--------------------|--------------------|--------|-----------|----------|
| Total  | 26               | Affx-79381658 | 1719                    | A             | Anx_score    | alcoholfreqweek | 74586 | 0.0187             | 0.004734        | 0.009417           | 0.02797            | 3.949  | 7.85E-05  | MT-RNR2  |
| Total  | 26               | Affx-79443408 | 1721                    | T             | Anx_score    | alcoholfreqweek | 74697 | 0.02525            | 0.007623        | 0.01031            | 0.04019            | 3.313  | 0.0009247 | MT-RNR2  |
| Total  | 26               | Affx-34462338 | 9716                    | C             | Anx_self     | alcoholfreqweek | 66881 | -0.00509           | 0.00146         | -0.007952          | -0.002228          | -3.486 | 0.00049   | MT-CO3   |
| Total  | 26               | Affx-79381683 | 9667                    | G             | Anx_score    | alcoholfreqweek | 74636 | -0.03791           | 0.01257         | -0.06262           | -0.01335           | -3.026 | 0.002513  | MT-CO3   |
| Total  | 26               | Affx-34462060 | 4561                    | C             | Anx_self     | alcoholfreqweek | 66829 | -0.005043          | 0.001677        | -0.006177          | -0.003925          | -3.027 | 0.00259   | MT-ND2   |
| Total  | 26               | Affx-79381708 | 14582                   | G             | Anx_self     | alcoholfreqweek | 66068 | -0.003968          | 0.001363        | -0.006638          | -0.001297          | -2.912 | 0.003598  | MT-ND6   |
| Total  | 26               | Affx-79381667 | 3992                    | T             | Anx_self     | alcoholfreqweek | 66828 | -0.002901          | 0.001202        | -0.005256          | -0.0005453         | -2.414 | 0.01579   | MT-ND1   |
| Total  | 26               | Affx-34462030 | 4024                    | G             | Anx_self     | alcoholfreqweek | 66840 | -0.003137          | 0.00132         | -0.005724          | -0.0005504         | -2.377 | 0.01746   | MT-ND1   |
| Total  | 26               | Affx-79381726 | 16391                   | A             | Anx_score    | alcoholfreqweek | 74454 | 0.02133            | 0.007596        | 0.006446           | 0.03622            | 2.809  | 0.004978  | MT-DLOOP |
| Total  | 26               | Affx-92047849 | 4529                    | T             | Anx_score    | alcoholfreqweek | 74494 | 0.02074            | 0.007709        | 0.005628           | 0.03585            | 2.69   | 0.007145  | MT-ND2   |
| Total  | 26               | Affx-79381715 | 15924                   | G             | Anx_score    | alcoholfreqweek | 74449 | 0.01524            | 0.005808        | 0.003853           | 0.02662            | 2.623  | 0.008709  | MT-TT    |
| Total  | 26               | Affx-79381704 | 13780                   | G             | Anx_score    | alcoholfreqweek | 74642 | 0.01935            | 0.007544        | 0.004567           | 0.03414            | 2.565  | 0.01031   | MT-ATP6  |
| Total  | 26               | Affx-79381694 | 10915                   | C             | Anx_score    | alcoholfreqweek | 74645 | 0.03222            | 0.01269         | 0.007321           | 0.05708            | 2.537  | 0.01119   | MT-ND4   |
| Total  | 26               | Affx-92047864 | 9123                    | A             | Anx_self     | alcoholfreqweek | 66817 | -0.003017          | 0.001306        | -0.005576          | -0.0004584         | -2.311 | 0.02083   | MT-ATP6  |
| Total  | 26               | Affx-79381691 | 10463                   | C             | Anx_self     | alcoholfreqweek | 66885 | -0.001268          | 0.0005658       | 0.0001592          | 0.002377           | 2.241  | 0.02501   | MT-TR    |
| Total  | 26               | Affx-34462122 | 5656                    | A             | Anx_self     | alcoholfreqweek | 66842 | -0.003413          | 0.001575        | -0.0065            | -0.0003264         | -2.167 | 0.03023   | MT-ND2   |
| Total  | 26               | Affx-52321525 | 150                     | T             | Anx_self     | alcoholfreqweek | 66759 | -0.001292          | 0.0006071       | -0.002482          | -0.000102          | -2.128 | 0.03335   | MT-DLOOP |
| Total  | 26               | Affx-89025732 | 8697                    | A             | Anx_self     | alcoholfreqweek | 66788 | -0.001214          | 0.000585        | 6.70E-05           | 0.00236            | 2.074  | 0.03804   | MT-ATP6  |
| Total  | 26               | Affx-79381672 | 5904                    | C             | Anx_self     | alcoholfreqweek | 66834 | -0.002635          | 0.001288        | -0.005159          | -0.0001115         | -2.047 | 0.04071   | MT-ND2   |
| Total  | 26               | Affx-79381701 | 4917                    | G             | Anx_self     | alcoholfreqweek | 66789 | 0.001172           | 0.0005872       | 2.06E-05           | 0.002322           | 1.995  | 0.04604   | MT-ND2   |
| Total  | 26               | Affx-79443437 | 5999                    | T             | Anx_self     | smokefreqday    | 66819 | -0.003458          | 0.001259        | -0.005925          | -0.0009909         | -2.747 | 0.006011  | MT-CO1   |
| Total  | 26               | Affx-79381664 | 3915                    | A             | Anx_self     | smokefreqday    | 66819 | 0.002771           | 0.001012        | 0.0007875          | 0.004755           | 2.738  | 0.006181  | MT-ND1   |
| Total  | 26               | Affx-92047865 | 14620                   | T             | Anx_self     | smokefreqday    | 66816 | -0.003             | 0.001249        | -0.005447          | -0.0005522         | -2.402 | 0.0163    | MT-ND6   |
| Total  | 26               | Affx-79443438 | 6047                    | G             | Anx_self     | smokefreqday    | 66844 | -0.002926          | 0.001266        | -0.005408          | -0.0004435         | -2.31  | 0.02088   | MT-CO1   |
| Total  | 26               | Affx-92047873 | 11332                   | T             | Anx_self     | smokefreqday    | 66841 | -0.002887          | 0.001264        | -0.005365          | -0.0004091         | -2.284 | 0.0224    | MT-ND4   |
| Total  | 26               | Affx-89025690 | 15693                   | C             | Anx_self     | smokefreqday    | 66869 | -0.002878          | 0.001266        | -0.005359          | -0.0003957         | -2.272 | 0.02306   | MT-CYB   |
| Total  | 26               | Affx-79381695 | 11377                   | A             | Anx_self     | smokefreqday    | 66722 | -0.002435          | 0.001177        | 0.0001276          | 0.004743           | 2.068  | 0.03862   | MT-ND4   |
| Total  | 26               | Affx-89025703 | 16193                   | T             | Anx_self     | smokefreqday    | 66667 | 0.00302            | 0.001472        | 0.0001342          | 0.005996           | 2.051  | 0.04026   | MT-DLOOP |
| Total  | 26               | Affx-52321525 | 150                     | T             | Anx_self     | smokefreqday    | 66759 | 0.001118           | 0.0005644       | 1.15E-05           | 0.002224           | 1.98   | 0.04767   | MT-DLOOP |
| Total  | 26               | Affx-86886472 | 12501                   | A             | Anx_score    | alcoholfreqweek | 74611 | 0.01646            | 0.007279        | 0.00219            | 0.03072            | 2.261  | 0.02378   | MT-ND5   |
| Total  | 26               | Affx-79381687 | 10238                   | C             | Anx_score    | alcoholfreqweek | 74589 | 0.01638            | 0.007372        | 0.001935           | 0.03083            | 2.222  | 0.02626   | MT-ND3   |
| Total  | 26               | Affx-79381663 | 3720                    | G             | Anx_score    | alcoholfreqweek | 74593 | 0.01355            | 0.01437         | 0.003383           | 0.05972            | 2.195  | 0.02814   | MT-ND1   |
| Total  | 26               | Affx-79381679 | 7768                    | G             | Anx_score    | alcoholfreqweek | 74686 | 0.01396            | 0.006375        | 0.001467           | 0.02646            | 2.19   | 0.02852   | MT-CO2   |
| Total  | 26               | Affx-34462179 | 6734                    | A             | Anx_score    | alcoholfreqweek | 74479 | 0.02987            | 0.0139          | 0.002632           | 0.05712            | 2.149  | 0.03161   | MT-CO1   |
| Male   | 26               | Affx-79381683 | 9667                    | G             | Anx_score    | alcoholfreqweek | 37788 | -0.05283           | 0.01438         | -0.08102           | -0.02465           | -3.674 | 0.0002393 | MT-CO3   |
| Male   | 26               | Affx-89025745 | 15218                   | G             | Anx_score    | alcoholfreqweek | 33767 | -0.02605           | 0.00845         | -0.04261           | -0.009484          | -3.082 | 0.002055  | MT-CYB   |
| Male   | 26               | Affx-89025691 | 14167                   | T             | Anx_score    | alcoholfreqweek | 33709 | 0.01574            | 0.005937        | 0.002581           | 0.03087            | 2.462  | 0.01382   | MT-TR    |
| Male   | 26               | Affx-89025674 | 4917                    | T             | Anx_score    | alcoholfreqweek | 33792 | -0.022405          | 0.007752        | -0.03764           | -0.007256          | -2.896 | 0.003782  | MT-DLOOP |
| Male   | 26               | Affx-79381671 | 4917                    | G             | Anx_score    | alcoholfreqweek | 33758 | 0.0155             | 0.005384        | 0.004951           | 0.02606            | 2.88   | 0.003984  | MT-ND2   |
| Male   | 26               | Affx-79381716 | 15928                   | A             | Anx_score    | alcoholfreqweek | 33621 | 0.01514            | 0.005285        | 0.004782           | 0.0255             | 2.865  | 0.004175  | MT-TT    |
| Male   | 26               | Affx-34461806 | 14905                   | A             | Anx_score    | alcoholfreqweek | 33760 | 0.01507            | 0.005326        | 0.004632           | 0.02551            | 2.83   | 0.004663  | MT-CYB   |
| Male   | 26               | Affx-89025732 | 8697                    | A             | Anx_score    | alcoholfreqweek | 33777 | 0.0151             | 0.005351        | 0.004609           | 0.02559            | 2.821  | 0.004786  | MT-ATP6  |
| Male   | 26               | Affx-34461648 | 11812                   | G             | Anx_score    | alcoholfreqweek | 33792 | 0.01675            | 0.005958        | 0.005073           | 0.02843            | 2.811  | 0.004936  | MT-ND4   |
| Male   | 26               | Affx-79381661 | 3480                    | G             | Anx_score    | alcoholfreqweek | 33736 | -0.01461           | 0.005813        | -0.02601           | -0.003218          | -2.514 | 0.01196   | MT-ND1   |
| Male   | 26               | Affx-89025746 | 14167                   | T             | Anx_score    | alcoholfreqweek | 33792 | -0.01437           | 0.005937        | -0.02581           | -0.00293           | -2.462 | 0.01382   | MT-ND6   |
| Male   | 26               | Affx-34461803 | 14798                   | G             | Anx_score    | alcoholfreqweek | 33790 | 0.01085            | 0.004426        | -0.01952           | 0.004276           | -1.452 | 0.14422   | MT-CYB   |
| Male   | 26               | Affx-89025778 | 5147                    | A             | Anx_score    | alcoholfreqweek | 33776 | 0.01693            | 0.006923        | 0.003364           | 0.0305             | 2.446  | 0.01446   | MT-ND2   |
| Male   | 26               | Affx-34461593 | 10550                   | G             | Anx_score    | alcoholfreqweek | 33798 | -0.0142            | 0.005831        | -0.02563           | -0.002773          | -2.435 | 0.01488   | MT-ND4L  |
| Male   | 26               | Affx-34462196 | 709                     | A             | Anx_score    | alcoholfreqweek | 33661 | 0.01068            | 0.004416        | 0.002028           | 0.01934            | 2.419  | 0.01556   | MT-RNR1  |
| Male   | 26               | Affx-89025685 | 9055                    | A             | Anx_score    | alcoholfreqweek | 33742 | -0.01386           | 0.005729        | -0.02509           | -0.002631          | -2.419 | 0.01556   | MT-ATP6  |
| Male   | 26               | Affx-89025753 | 11299                   | C             | Anx_score    | alcoholfreqweek | 33803 | -0.01394           | 0.005817        | -0.02534           | -0.002537          | -2.396 | 0.01658   | MT-ND4   |
| Male   | 26               | Affx-79381656 | 750                     | A             | Anx_score    | smokefreqday    | 33084 | 0.0299             | 0.01248         | 0.005432           | 0.05437            | 2.395  | 0.01662   | MT-RNR1  |
| Male   | 26               | Affx-79443409 | 1721                    | T             | Anx_score    | alcoholfreqweek | 33806 | 0.02063            | 0.006632        | 0.003709           | 0.03755            | 2.39   | 0.01687   | MT-RNR2  |
| Male   | 26               | Affx-79381658 | 1719                    | A             | Anx_score    | alcoholfreqweek | 33758 | 0.01264            | 0.005476        | 0.000912           | 0.02338            | 2.309  | 0.02094   | MT-RNR2  |
| Male   | 26               | Affx-79381684 | 9698                    | C             | Anx_score    | alcoholfreqweek | 33706 | -0.01353           | 0.005861        | -0.02501           | -0.00204           | -2.308 | 0.02101   | MT-CO3   |
| Male   | 26               | Affx-79381694 | 10915                   | C             | Anx_score    | alcoholfreqweek | 33780 | 0.01343            | 0.01477         | 0.002476           | 0.06038            | 2.128  | 0.03338   | MT-ND4   |
| Male   | 26               | Affx-79381690 | 10398                   | G             | Anx_score    | alcoholfreqweek | 33634 | -0.008064          | 0.003972        | -0.01585           | -0.002079          | -2.03  | 0.04234   | MT-ND3   |
| Male   | 26               | Affx-34462196 | 709                     | A             | Anx_self     | smokefreqday    | 30751 | -0.001596          | 0.0005157       | -0.002606          | -0.0005849         | -3.094 | 0.001976  | MT-RNR1  |
| Male   | 26               | Affx-79381656 | 750                     | A             | Anx_self     | smokefreqday    | 30213 | 0.004243           | 0.001525        | 0.001254           | 0.007232           | 2.782  | 0.005401  | MT-RNR1  |
| Male   | 26               | Affx-34461788 | 1438                    | A             | Anx_self     | smokefreqday    | 30832 | 0.003108           | 0.001182        | 0.000791           | 0.005425           | 2.629  | 0.008565  | MT-RNR1  |
| Male   | 26               | Affx-34462122 | 5656                    | G             | Anx_self     | alcoholfreqweek | 30869 | -0.004908          | 0.001872        | -0.008578          | -0.001238          | -2.621 | 0.00876   | MT-ND2   |
| Male   | 26               | Affx-3446195  | 2163                    | T             | Anx_self     | smokefreqday    | 30810 | -0.00489           | 0.001872        | -0.008582          | -0.001238          | -2.444 | 0.00876   | MT-DLOOP |
| Male   | 26               | Affx-34462075 | 4769                    | A             | Anx_self     | smokefreqday    | 30871 | 0.002945           | 0.001221        | 0.0005711          | 0.005356           | 2.428  | 0.01519   | MT-ND2   |
| Male   | 26               | Affx-79381683 | 9667                    | G             | Anx_self     | alcoholfreqweek | 30867 | 0.000463           | 0.001695        | 0.0007277          | 0.007372           | 2.389  | 0.01689   | MT-CO3   |
| Male   | 26               | Affx-79381664 | 3915                    | A             | Anx_self     | smokefreqday    | 30863 | 0.002716           | 0.001147        | 0.0004681          | 0.004965           | 2.368  | 0.01789   | MT-ND1   |
| Male   | 26               | Affx-34462179 | 6734                    | A             | Anx_self     | smokefreqday    | 30791 | 0.004253           | 0.001821        | 0.0006833          | 0.007822           | 2.335  | 0.01954   | MT-CO1   |
| Male   | 26               | Affx-52321525 | 150                     | T             | Anx_self     | alcoholfreqweek | 30844 | -0.001643          | 0.000705        | -0.003025          | -0.0002614         | -2.331 | 0.01977   | MT-DLOOP |
| Male   | 26               | Affx-79381691 | 10463                   | C             | Anx_self     | alcoholfreqweek | 30787 | 0.001456           | 0.0006414       | 0.0001985          | 0.002713           | 2.269  | 0.02325   | MT-TR    |
| Male   | 26               | Affx-89025778 | 5147                    | A             | Anx_self     | smokefreqday    | 30852 | -0.001852          | 0.0008167       | -0.003452          | -0.0002511         | -2.267 | 0.02337   | MT-ND2   |
| Male   | 26               | Affx-79381679 | 7768                    | G             | Anx_self     | smokefreqday    | 30882 | 0.002255           | 0.001005        | 0.0002847          | 0.002247           | 2.243  | 0.0249    | MT-CO2   |
| Male   | 26               | Affx-34461648 | 11812                   | G             | Anx_self     | alcoholfreqweek | 30872 | 0.001619           | 0.0007466       | 0.0001566          | 0.003082           | 2.2    | 0.03003   | MT-ND4   |
| Male   | 26               | Affx-79381671 | 4917                    | G             | Anx_self     | alcoholfreqweek | 30840 | 0.001453           | 0.00067         | 0.0001398          | 0.002766           | 2.169  | 0.03012   | MT-ND2   |
| Male   | 26               | Affx-34461715 | 13105                   | G             | Anx_self     | smokefreqday    | 30814 | -0.003663          | 0.001711        | -0.007016          | -0.0003106         | -2.142 | 0.03224   | MT-ND5   |
| Male   | 26               | Affx-79443437 | 5999                    | C             | Anx_self     | smokefreqday    | 30866 | -0.002938          | 0.001386        | -0.005655          | -0.0002218         | -2.12  | 0.03402   | MT-CO1   |
| Male   | 26               | Affx-34461806 | 14905                   | A             | Anx_self     | alcoholfreqweek | 30845 | 0.001377           | 0.0006627       | 7.80E-05           | 0.002676           | 2.078  | 0.03776   | MT-CYB   |
| Male   | 26               | Affx-89025732 | 8697                    | A             | Anx_self     | alcoholfreqweek | 30857 | 0.001371           | 0.0006652       | 6.76E-05           | 0.002675           | 2.062  | 0.03925   | MT-ATP6  |
| Male   | 26               | Affx-79381710 | 15928                   | A             | Anx_self     | alcoholfreqweek | 30721 | 0.001329           | 0.0006566       | 4.19E-05           | 0.002616           | 2.024  | 0.04301   | MT-TT    |
| Male   | 26               | Affx-34461837 | 1719                    | T             | Anx_self     | smokefreqday    | 30868 | -0.002812          | 0.001397        | -0.00518           | -0.00123</         |        |           |          |

**Table S5. Associations of Mitochondrial Gene-by-environment Interactions With Depression**

| Gender | Chromosome (CHR) | SNP ID        | Base Pair Position (BP) | Allele 1 (A1) | Depression Type | Environment     | NMISS  | Effect Size (BETA) | Std. Error (SE) | 95% CI Lower (L95) | 95% CI Upper (U95) | STAT   | P-value   | Gene     |
|--------|------------------|---------------|-------------------------|---------------|-----------------|-----------------|--------|--------------------|-----------------|--------------------|--------------------|--------|-----------|----------|
| Total  | 26               | Affx-79381658 | 1719                    | A             | Dep_score       | alcoholfreqweek | 74309  | 0.01748            | 0.004989        | 0.007702           | 0.02726            | 3.504  | 0.0004588 | MT-RNR2  |
| Total  | 26               | Affx-79443409 | 1721                    | T             | Dep_score       | alcoholfreqweek | 74421  | 0.02247            | 0.008043        | 0.006711           | 0.03824            | 2.794  | 0.005201  | MT-RNR2  |
| Total  | 26               | Affx-86886472 | 12501                   | A             | Dep_score       | alcoholfreqweek | 74335  | 0.02119            | 0.007667        | 0.006164           | 0.03622            | 2.764  | 0.005712  | MT-N05   |
| Total  | 26               | Affx-79381667 | 3992                    | T             | Dep_score       | smokefreqday    | 74371  | 0.02414            | 0.008992        | 0.006515           | 0.04176            | 2.685  | 0.007265  | MT-N01   |
| Total  | 26               | Affx-92047849 | 4529                    | T             | Dep_score       | alcoholfreqweek | 74416  | 0.02179            | 0.008122        | 0.005875           | 0.03771            | 2.683  | 0.007291  | MT-N02   |
| Total  | 26               | Affx-79381704 | 13780                   | G             | Dep_score       | alcoholfreqweek | 74363  | 0.01967            | 0.007945        | 0.004098           | 0.03524            | 2.476  | 0.0133    | MT-N05   |
| Total  | 26               | Affx-79381687 | 10238                   | C             | Dep_score       | alcoholfreqweek | 74314  | 0.01906            | 0.007769        | 0.003832           | 0.03429            | 2.453  | 0.01416   | MT-N03   |
| Total  | 26               | Affx-79381700 | 12705                   | T             | Dep_score       | alcoholfreqweek | 74344  | 0.01319            | 0.005478        | 0.002453           | 0.02392            | 2.408  | 0.01666   | MT-N05   |
| Total  | 26               | Affx-89025742 | 6371                    | T             | Dep_score       | alcoholfreqweek | 74323  | 0.02776            | 0.01159         | 0.005035           | 0.05048            | 2.394  | 0.01666   | MT-C01   |
| Total  | 26               | Affx-89025745 | 15218                   | G             | Dep_score       | alcoholfreqweek | 74322  | -0.01801           | 0.007721        | -0.03315           | -0.002882          | -2.333 | 0.01964   | MT-CYB   |
| Total  | 26               | Affx-79381726 | 16391                   | A             | Dep_score       | alcoholfreqweek | 74177  | 0.01838            | 0.007981        | 0.002741           | 0.03402            | 2.303  | 0.02126   | MT-DLOOP |
| Total  | 26               | Affx-79381667 | 3992                    | T             | Dep_score       | alcoholfreqweek | 74371  | -0.02294           | 0.0101          | -0.04275           | -0.003136          | -2.27  | 0.02319   | MT-N01   |
| Total  | 26               | Affx-79381678 | 6221                    | C             | Dep_score       | alcoholfreqweek | 74353  | 0.02432            | 0.0112          | 0.002367           | 0.04628            | 2.171  | 0.02991   | MT-C01   |
| Total  | 26               | Affx-79381694 | 10915                   | C             | Dep_score       | alcoholfreqweek | 74368  | 0.02837            | 0.01326         | 0.002384           | 0.05436            | 2.14   | 0.03238   | MT-N04   |
| Total  | 26               | Affx-79381679 | 7768                    | G             | Dep_score       | alcoholfreqweek | 74409  | 0.01396            | 0.006716        | 0.0007935          | 0.02712            | 2.078  | 0.0377    | MT-C02   |
| Total  | 26               | Affx-79381715 | 15924                   | G             | Dep_score       | alcoholfreqweek | 74171  | 0.01236            | 0.006133        | 0.000344           | 0.02438            | 2.016  | 0.0438    | MT-TT    |
| Total  | 26               | Affx-79381683 | 9667                    | G             | Dep_score       | alcoholfreqweek | 74360  | -0.02641           | 0.01317         | -0.05222           | -0.0066009         | -2.006 | 0.0449    | MT-C03   |
| Total  | 26               | Affx-34461763 | 13966                   | G             | Dep_score       | alcoholfreqweek | 74377  | 0.02075            | 0.01038         | 0.0003954          | 0.0411             | 1.998  | 0.04572   | MT-N05   |
| Total  | 26               | Affx-79381676 | 5495                    | C             | Dep_score       | alcoholfreqweek | 74320  | -0.02391           | 0.01208         | -0.04758           | -0.0002447         | -1.98  | 0.04768   | MT-N02   |
| Total  | 26               | Affx-34461648 | 11812                   | G             | Dep_score       | alcoholfreqweek | 74370  | 0.01068            | 0.005407        | 8.12E-05           | 0.02128            | 1.975  | 0.04827   | MT-N04   |
| Total  | 26               | Affx-79381667 | 3992                    | T             | Dep_self        | alcoholfreqweek | 107948 | -0.002827          | 0.001057        | -0.004898          | -0.0007563         | -2.676 | 0.007457  | MT-N01   |
| Total  | 26               | Affx-89025715 | 11674                   | T             | Dep_self        | alcoholfreqweek | 108028 | -0.002496          | 0.001156        | -0.004762          | -0.0002303         | -2.159 | 0.03083   | MT-N04   |
| Total  | 26               | Affx-89025742 | 497                     | T             | Dep_self        | smokefreqday    | 107979 | 0.001653           | 0.0007663       | 0.0001508          | 0.003155           | 2.157  | 0.03103   | MT-DLOOP |
| Total  | 26               | Affx-79381672 | 5004                    | C             | Dep_self        | alcoholfreqweek | 107982 | -0.002397          | 0.001117        | -0.004586          | -0.0002609         | -2.145 | 0.03194   | MT-N02   |
| Total  | 26               | Affx-92047864 | 9123                    | A             | Dep_self        | alcoholfreqweek | 107952 | -0.002391          | 0.001123        | -0.004591          | -0.0001904         | -2.13  | 0.03321   | MT-ATP6  |
| Total  | 26               | Affx-89025749 | 8994                    | A             | Dep_self        | alcoholfreqweek | 108012 | -0.002305          | 0.00109         | -0.00444           | -0.0001695         | -2.116 | 0.03439   | MT-ATP6  |
| Total  | 26               | Affx-34461684 | 1243                    | C             | Dep_self        | alcoholfreqweek | 108065 | -0.002432          | 0.001161        | -0.004707          | -0.0001568         | -2.095 | 0.03617   | MT-RNR1  |
| Total  | 26               | Affx-92047855 | 11947                   | G             | Dep_self        | alcoholfreqweek | 107972 | -0.002446          | 0.001171        | -0.004741          | -0.0001521         | -2.09  | 0.03663   | MT-N04   |
| Male   | 26               | Affx-79381678 | 6221                    | C             | Dep_self        | smokefreqday    | 46797  | -0.005722          | 0.00189         | -0.009427          | -0.002018          | -3.028 | 0.002467  | MT-C01   |
| Male   | 26               | Affx-89025742 | 6371                    | T             | Dep_self        | smokefreqday    | 46774  | -0.005987          | 0.001987        | -0.009882          | -0.002092          | -3.013 | 0.002592  | MT-C01   |
| Male   | 26               | Affx-89025745 | 15218                   | G             | Dep_score       | alcoholfreqweek | 33646  | -0.02676           | 0.009387        | -0.04515           | -0.008357          | -2.85  | 0.004372  | MT-CYB   |
| Male   | 26               | Affx-34461648 | 11812                   | G             | Dep_score       | alcoholfreqweek | 33673  | 0.01874            | 0.00664         | 0.005731           | 0.03176            | 2.823  | 0.004759  | MT-N04   |
| Male   | 26               | Affx-79381667 | 3992                    | T             | Dep_score       | alcoholfreqweek | 33666  | -0.03425           | 0.01224         | -0.05825           | -0.01025           | -2.797 | 0.005154  | MT-N01   |
| Male   | 26               | Affx-34462196 | 709                     | A             | Dep_score       | alcoholfreqweek | 33544  | 0.01319            | 0.004931        | 0.003531           | 0.02286            | 2.676  | 0.007453  | MT-RNR1  |
| Male   | 26               | Affx-79381683 | 9667                    | G             | Dep_score       | alcoholfreqweek | 33668  | -0.04237           | 0.01584         | -0.07341           | -0.01133           | -2.675 | 0.007473  | MT-C03   |
| Male   | 26               | Affx-79381691 | 10463                   | C             | Dep_score       | alcoholfreqweek | 33590  | 0.01478            | 0.005774        | 0.003464           | 0.02261            | 2.56   | 0.01047   | MT-TR    |
| Male   | 26               | Affx-34462179 | 6734                    | A             | Dep_score       | smokefreqday    | 33591  | 0.04116            | 0.01684         | 0.008156           | 0.07416            | 2.444  | 0.01452   | MT-C01   |
| Male   | 26               | Affx-79381716 | 15928                   | A             | Dep_score       | alcoholfreqweek | 33503  | 0.01403            | 0.00589         | 0.002484           | 0.02557            | 2.382  | 0.01724   | MT-TT    |
| Male   | 26               | Affx-34461806 | 14905                   | A             | Dep_score       | alcoholfreqweek | 33643  | 0.0138             | 0.005938        | 0.002165           | 0.02544            | 2.325  | 0.0201    | MT-CYB   |
| Male   | 26               | Affx-34462030 | 4024                    | G             | Dep_score       | alcoholfreqweek | 33671  | -0.03              | 0.01334         | -0.05615           | -0.00385           | -2.249 | 0.02455   | MT-N01   |
| Male   | 26               | Affx-89025732 | 8697                    | A             | Dep_score       | alcoholfreqweek | 33657  | 0.01325            | 0.005962        | 0.001563           | 0.02493            | 2.222  | 0.02628   | MT-ATP6  |
| Male   | 26               | Affx-79381671 | 4917                    | G             | Dep_score       | alcoholfreqweek | 33639  | 0.01308            | 0.005999        | 0.00132            | 0.02483            | 2.18   | 0.02926   | MT-N02   |
| Male   | 26               | Affx-79381667 | 3992                    | T             | Dep_score       | smokefreqday    | 33666  | 0.02356            | 0.01081         | 0.002363           | 0.04475            | 2.178  | 0.02938   | MT-N01   |
| Male   | 26               | Affx-89025778 | 5147                    | A             | Dep_score       | alcoholfreqweek | 33655  | 0.01672            | 0.007791        | 0.001449           | 0.03199            | 2.146  | 0.03188   | MT-N02   |
| Male   | 26               | Affx-92047864 | 9123                    | A             | Dep_score       | alcoholfreqweek | 33663  | -0.02794           | 0.01324         | -0.05388           | -0.001994          | -2.111 | 0.03481   | MT-ATP6  |
| Male   | 26               | Affx-79381678 | 6221                    | C             | Dep_score       | alcoholfreqweek | 33656  | 0.02872            | 0.01382         | 0.01643            | 0.0558             | 2.079  | 0.03763   | MT-C01   |
| Male   | 26               | Affx-79381708 | 14582                   | G             | Dep_score       | alcoholfreqweek | 33316  | -0.02781           | 0.01376         | -0.05477           | -0.0008468         | -2.022 | 0.04323   | MT-N06   |
| Male   | 26               | Affx-89025674 | 497                     | T             | Dep_self        | alcoholfreqweek | 46821  | -0.002626          | 0.0009977       | -0.004581          | -0.0006702         | -2.632 | 0.008498  | MT-DLOOP |
| Male   | 26               | Affx-89025742 | 6371                    | T             | Dep_self        | alcoholfreqweek | 46774  | 0.003958           | 0.001555        | 0.0009104          | 0.007005           | 2.546  | 0.01091   | MT-C01   |
| Male   | 26               | Affx-79381672 | 5004                    | C             | Dep_self        | alcoholfreqweek | 33675  | -0.02569           | 0.01306         | -0.05129           | -8.93E-05          | -1.967 | 0.04921   | MT-N02   |
| Male   | 26               | Affx-34461763 | 13966                   | G             | Dep_self        | smokefreqday    | 46814  | -0.00402           | 0.001634        | -0.007222          | -0.0008183         | -2.461 | 0.01386   | MT-N05   |
| Male   | 26               | Affx-79381678 | 6221                    | C             | Dep_self        | alcoholfreqweek | 46797  | 0.003402           | 0.001527        | 0.0004096          | 0.006394           | 2.228  | 0.02587   | MT-C01   |
| Male   | 26               | Affx-79381667 | 3992                    | T             | Dep_self        | alcoholfreqweek | 46814  | -0.002965          | 0.001345        | -0.005602          | -0.0003289         | -2.204 | 0.0275    | MT-N01   |
| Male   | 26               | Affx-79381691 | 10463                   | C             | Dep_self        | alcoholfreqweek | 46701  | 0.001354           | 0.0006382       | 0.0001034          | 0.002605           | 2.122  | 0.03385   | MT-TR    |
| Female | 26               | Affx-86886472 | 12501                   | A             | Dep_score       | alcoholfreqweek | 40684  | 0.04605            | 0.0138          | 0.019              | 0.0731             | 3.337  | 0.0008491 | MT-N05   |
| Female | 26               | Affx-79381658 | 1719                    | A             | Dep_score       | alcoholfreqweek | 40671  | 0.02934            | 0.008889        | 0.01192            | 0.04676            | 3.301  | 0.0009658 | MT-RNR2  |
| Female | 26               | Affx-89025745 | 15218                   | G             | Dep_self        | alcoholfreqweek | 61106  | 0.004537           | 0.001342        | 0.001907           | 0.007166           | 3.381  | 0.0007221 | MT-CYB   |
| Female | 26               | Affx-79381676 | 5495                    | C             | Dep_self        | alcoholfreqweek | 61110  | 0.006888           | 0.002149        | 0.002676           | 0.0111             | 3.205  | 0.001351  | MT-N02   |
| Female | 26               | Affx-34461684 | 1243                    | C             | Dep_self        | alcoholfreqweek | 61206  | -0.006482          | 0.002116        | -0.01063           | -0.002334          | -3.063 | 0.002193  | MT-RNR1  |
| Female | 26               | Affx-92047855 | 11947                   | G             | Dep_self        | alcoholfreqweek | 61157  | -0.006501          | 0.002137        | -0.01069           | -0.002313          | -3.042 | 0.002348  | MT-N04   |
| Female | 26               | Affx-89025715 | 11674                   | T             | Dep_self        | alcoholfreqweek | 61186  | -0.006272          | 0.002111        | -0.01041           | -0.002135          | -2.971 | 0.002965  | MT-N04   |
| Female | 26               | Affx-34462094 | 5046                    | A             | Dep_self        | alcoholfreqweek | 61084  | -0.006256          | 0.002108        | -0.01039           | -0.002125          | -2.968 | 0.002996  | MT-N02   |
| Female | 26               | Affx-92047849 | 4529                    | T             | Dep_score       | alcoholfreqweek | 40725  | 0.04573            | 0.015           | 0.01633            | 0.07513            | 3.048  | 0.002303  | MT-N02   |
| Female | 26               | Affx-34462179 | 6734                    | A             | Dep_score       | smokefreqday    | 40611  | -0.07695           | 0.02539         | -0.1267            | -0.02718           | -3.03  | 0.002444  | MT-C01   |
| Female | 26               | Affx-79381679 | 7768                    | G             | Dep_score       | alcoholfreqweek | 40724  | 0.03567            | 0.01206         | 0.01204            | 0.0593             | 2.959  | 0.003091  | MT-C02   |
| Female | 26               | Affx-79381704 | 13780                   | G             | Dep_score       | alcoholfreqweek | 40701  | 0.04133            | 0.01454         | 0.01282            | 0.06984            | 2.842  | 0.00449   | MT-N05   |
| Female | 26               | Affx-79381687 | 10238                   | C             | Dep_score       | alcoholfreqweek | 40682  | 0.03917            | 0.01394         | 0.01185            | 0.06649            | 2.81   | 0.004952  | MT-N03   |
| Female | 26               | Affx-79381726 | 16391                   | A             | Dep_score       | alcoholfreqweek | 40589  | 0.04131            | 0.01471         | 0.01248            | 0.07014            | 2.809  | 0.004979  | MT-DLOOP |
| Female | 26               | Affx-79443409 | 1721                    | T             | Dep_score       | alcoholfreqweek | 40733  | 0.04091            | 0.01465         | 0.0122             | 0.06963            | 2.793  | 0.005232  | MT-RNR2  |
| Female | 26               | Affx-89025739 | 3796                    | G             | Dep_score       | smokefreqday    | 40710  | 0.05329            | 0.01962         | 0.01482            | 0.09175            | 2.715  | 0.006623  | MT-N01   |
| Female | 26               | Affx-79381694 | 10915                   | C             | Dep_score       | smokefreqday    | 40706  | -0.05643           | 0.02178         | -0.09912           | -0.01373           | -2.59  | 0.009588  | MT-N04   |
| Female | 26               | Affx-89025690 | 15693                   | C             | Dep_score       | alcoholfreqweek | 40735  | -0.04562           | 0.01825         | -0.08139           | -0.009847          | -2.5   | 0.01244   | MT-CYB   |
| Female | 26               | Affx-79443438 | 6047                    | G             | Dep_score       | alcoholfreqweek | 40715  | -0.04472           | 0.01824         | -0.08048           | -0.009644          | -2.451 | 0.01424   | MT-C01   |
| Female | 26               | Affx-92047865 | 14620                   | T             | Dep_score       | alcoholfreqweek | 40700  | -0.04396           | 0.01812         | -0.07947           | -0.008452          | -2.426 | 0.01525   | MT-N06   |
| Female | 26               | Affx-92047873 | 11332                   | T             | Dep_score       | alcoholfreqweek | 40714  | -0.04402           | 0.01821         | -0.07972           | -0.008328          | -2.417 | 0.01564   | MT-N04   |
| Female | 26               | Affx-79381709 | 15043                   | A             | Dep_score       | alcoholfreqweek | 40643  | 0.0318             | 0.01333         | 0.005673           | 0.05792            | 2.386  | 0.01706   | MT-CYB   |
| Female | 26               | Affx-79443437 | 5999                    | C             | Dep_score       | alcoholfreqweek | 40695  | -0.04285           | 0.01849         | -0.07909           | -0.006612          | -2.318 | 0.02048   | MT-C01   |
| Female | 26               | Affx-79381715 | 15924                   | G             | Dep_score       | alcoholfreqweek | 40592  | 0.02539            | 0.01097         | 0.003885           | 0.04689            | 2.314  | 0.02067   | MT-TT    |
| Female | 26               | Affx-89025749 | 8                       |               |                 |                 |        |                    |                 |                    |                    |        |           |          |

**Table S6. Associations of Mitochondrial Gene-by-environment Interactions With Self-harm**

| Gender | Chromosome (CHR) | SNP ID        | Base Pair Position (BP) | Allele 1 (A1) | Environment     | NMISS  | Effect Size (BETA) | Std. Error (SE) | 95% CI Lower (L95) | 95% CI Upper (U95) | STAT   | P-value   | Gene     |
|--------|------------------|---------------|-------------------------|---------------|-----------------|--------|--------------------|-----------------|--------------------|--------------------|--------|-----------|----------|
| Total  | 26               | Affx-92047859 | 8448                    | C             | alcoholfreqweek | 108702 | 0.002951           | 0.001092        | 0.0008114          | 0.00509            | 2.703  | 0.006868  | MT-ATP8  |
| Total  | 26               | Affx-79381672 | 5004                    | C             | alcoholfreqweek | 108661 | -0.001785          | 0.0008598       | -0.00347           | -9.96E-05          | -2.076 | 0.03792   | MT-ND2   |
| Total  | 26               | Affx-79443499 | 13759                   | A             | alcoholfreqweek | 108280 | 0.001853           | 0.0009057       | 7.76E-05           | 0.003628           | 2.046  | 0.04079   | MT-ND5   |
| Total  | 26               | Affx-92047864 | 9123                    | A             | alcoholfreqweek | 108623 | -0.001741          | 0.0008621       | -0.00343           | -5.09E-05          | -2.019 | 0.04349   | MT-ATP6  |
| Total  | 26               | Affx-92047856 | 13020                   | C             | smokefreqday    | 108655 | -0.0022            | 0.001103        | -0.004363          | -3.75E-05          | -1.994 | 0.04616   | MT-ND5   |
| Total  | 26               | Affx-79381715 | 15924                   | G             | smokefreqday    | 108337 | -0.001018          | 0.000519        | -0.002035          | -1.06E-06          | -1.962 | 0.04976   | MT-TT    |
| Male   | 26               | Affx-92047859 | 8448                    | C             | alcoholfreqweek | 47466  | 0.004072           | 0.001299        | 0.001525           | 0.006619           | 3.134  | 0.001726  | MT-ATP8  |
| Male   | 26               | Affx-79443532 | 16362                   | C             | alcoholfreqweek | 47337  | -0.00123           | 0.0004961       | -0.002203          | -0.0002578         | -2.48  | 0.01315   | MT-DLOOP |
| Male   | 26               | Affx-79443499 | 13759                   | A             | alcoholfreqweek | 47275  | 0.002555           | 0.001058        | 0.0004815          | 0.004628           | 2.415  | 0.01573   | MT-ND5   |
| Male   | 26               | Affx-79381685 | 9899                    | C             | smokefreqday    | 47445  | -0.002458          | 0.001019        | -0.004454          | -0.0004618         | -2.413 | 0.01581   | MT-CO3   |
| Male   | 26               | Affx-89025739 | 3796                    | G             | smokefreqday    | 47434  | -0.002372          | 0.001182        | -0.004688          | -5.59E-05          | -2.007 | 0.04473   | MT-ND1   |
| Male   | 26               | Affx-79443531 | 16356                   | C             | alcoholfreqweek | 47240  | -0.00149           | 0.0007451       | -0.00295           | -2.96E-05          | -2     | 0.04554   | MT-DLOOP |
| Female | 26               | Affx-34461653 | 11914                   | A             | smokefreqday    | 61070  | -0.005421          | 0.001561        | -0.008481          | -0.002361          | -3.472 | 0.0005169 | MT-ND4   |
| Female | 26               | Affx-34461653 | 11914                   | A             | alcoholfreqweek | 61070  | 0.004292           | 0.001524        | 0.001304           | 0.00728            | 2.816  | 0.004871  | MT-ND4   |
| Female | 26               | Affx-79443409 | 1721                    | T             | smokefreqday    | 61242  | 0.003524           | 0.001291        | 0.0009932          | 0.006055           | 2.729  | 0.006353  | MT-RNR2  |
| Female | 26               | Affx-89025778 | 5147                    | A             | alcoholfreqweek | 61210  | -0.002378          | 0.0009245       | -0.00419           | -0.0005661         | -2.572 | 0.0101    | MT-ND2   |
| Female | 26               | Affx-89025674 | 497                     | T             | alcoholfreqweek | 61218  | 0.002535           | 0.001004        | 0.0005669          | 0.004504           | 2.524  | 0.01159   | MT-DLOOP |
| Female | 26               | Affx-79443511 | 14872                   | T             | alcoholfreqweek | 61235  | -0.005241          | 0.002147        | -0.009449          | -0.001032          | -2.441 | 0.01466   | MT-CYB   |
| Female | 26               | Affx-34462196 | 709                     | A             | alcoholfreqweek | 60956  | -0.001512          | 0.0006345       | -0.002756          | -0.0002682         | -2.383 | 0.01719   | MT-RNR1  |
| Female | 26               | Affx-89025703 | 16193                   | T             | smokefreqday    | 61035  | 0.004116           | 0.001822        | 0.0005457          | 0.007686           | 2.26   | 0.02385   | MT-DLOOP |
| Female | 26               | Affx-34461648 | 11812                   | G             | alcoholfreqweek | 61198  | -0.001741          | 0.0008269       | -0.003362          | -0.0001204         | -2.106 | 0.03524   | MT-ND4   |
| Female | 26               | Affx-89025751 | 4793                    | G             | alcoholfreqweek | 61195  | -0.003231          | 0.001569        | -0.006306          | -0.0001558         | -2.059 | 0.03947   | MT-ND2   |
| Female | 26               | Affx-79381691 | 10463                   | C             | alcoholfreqweek | 61090  | -0.0015            | 0.0007363       | -0.002943          | -5.69E-05          | -2.037 | 0.04163   | MT-TR    |
| Female | 26               | Affx-52321525 | 150                     | T             | smokefreqday    | 61136  | 0.001467           | 0.0007278       | 0.004E-05          | 0.002893           | 2.016  | 0.04385   | MT-DLOOP |
| Female | 26               | Affx-79381671 | 4917                    | G             | alcoholfreqweek | 61164  | -0.001492          | 0.0007563       | -0.002975          | -1.02E-05          | -1.973 | 0.04846   | MT-ND2   |
